# Supplementary material for: COPII mitigates ER stress by promoting formation of ER whorls
Source: PubMed Central journal article supplement (PMC8026990; doi:10.1038/s41422-020-00416-2), 2020-09-28
Supplement: 41422_2020_416_MOESM1_ESM.pdf [file 41422_2020_416_MOESM1_ESM.pdf]

**a**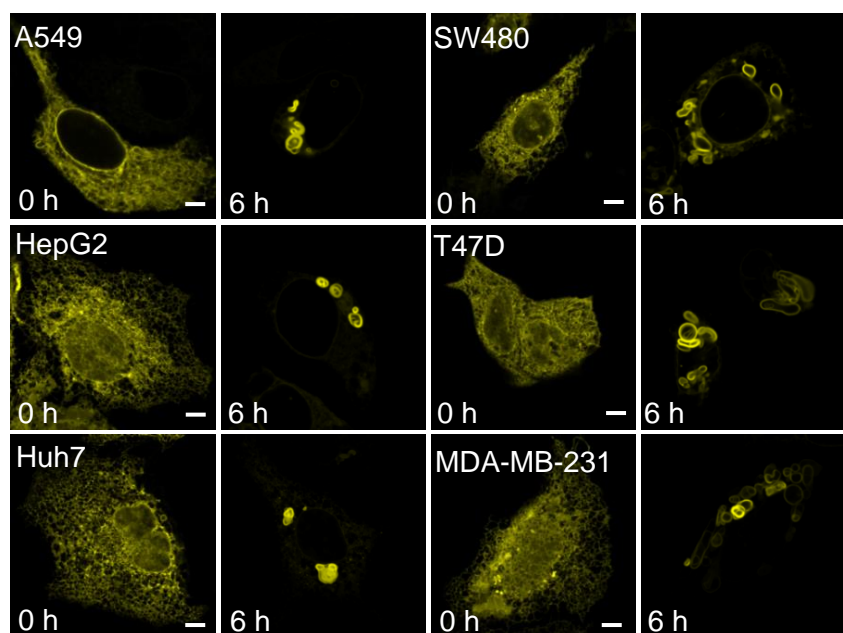**b**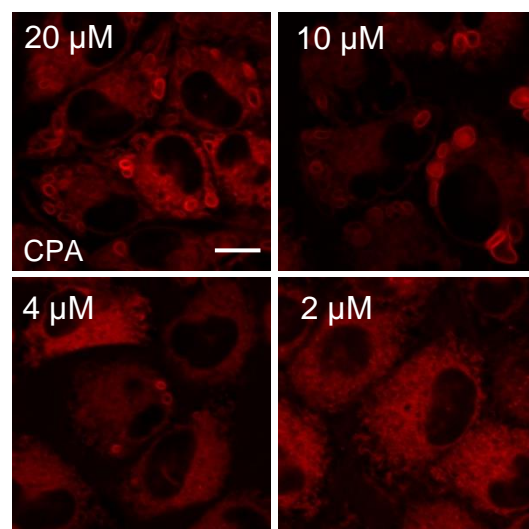**d**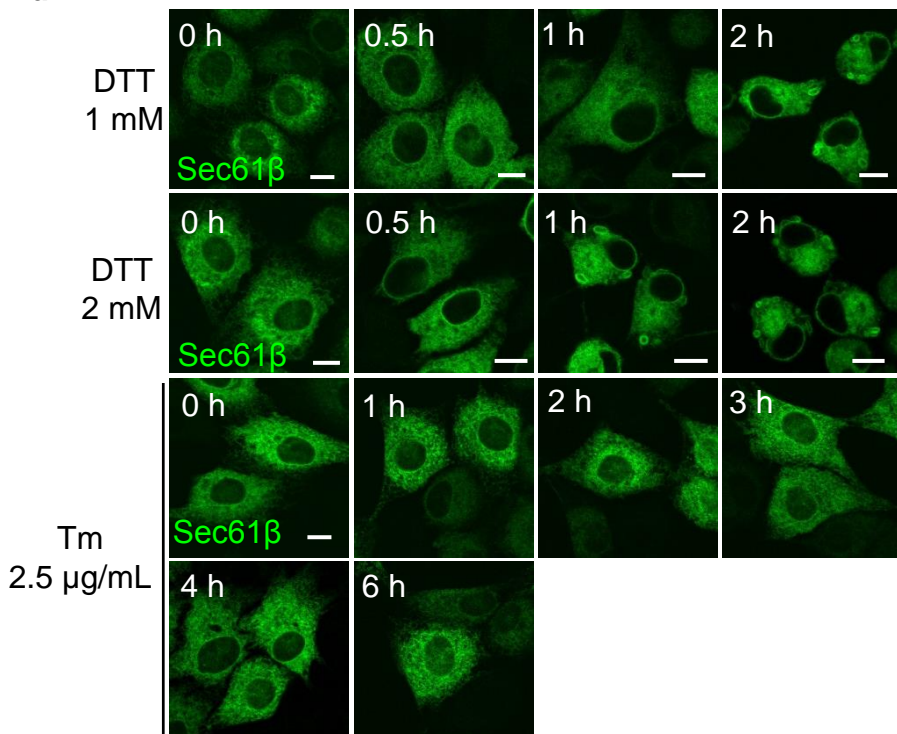**c**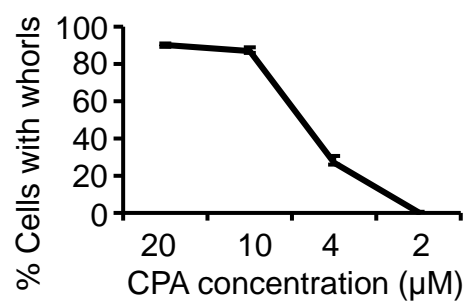**e**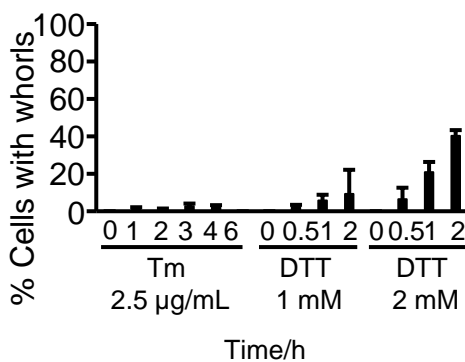**f**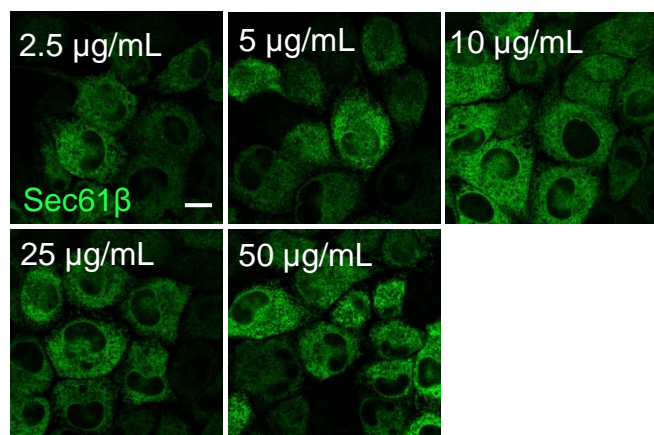**g**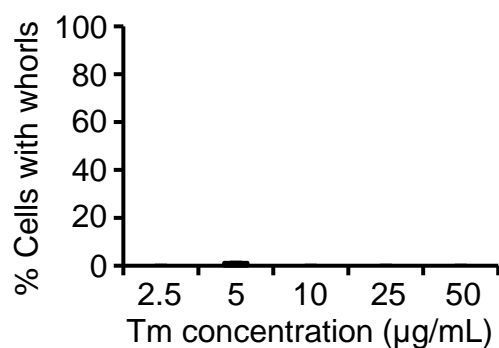

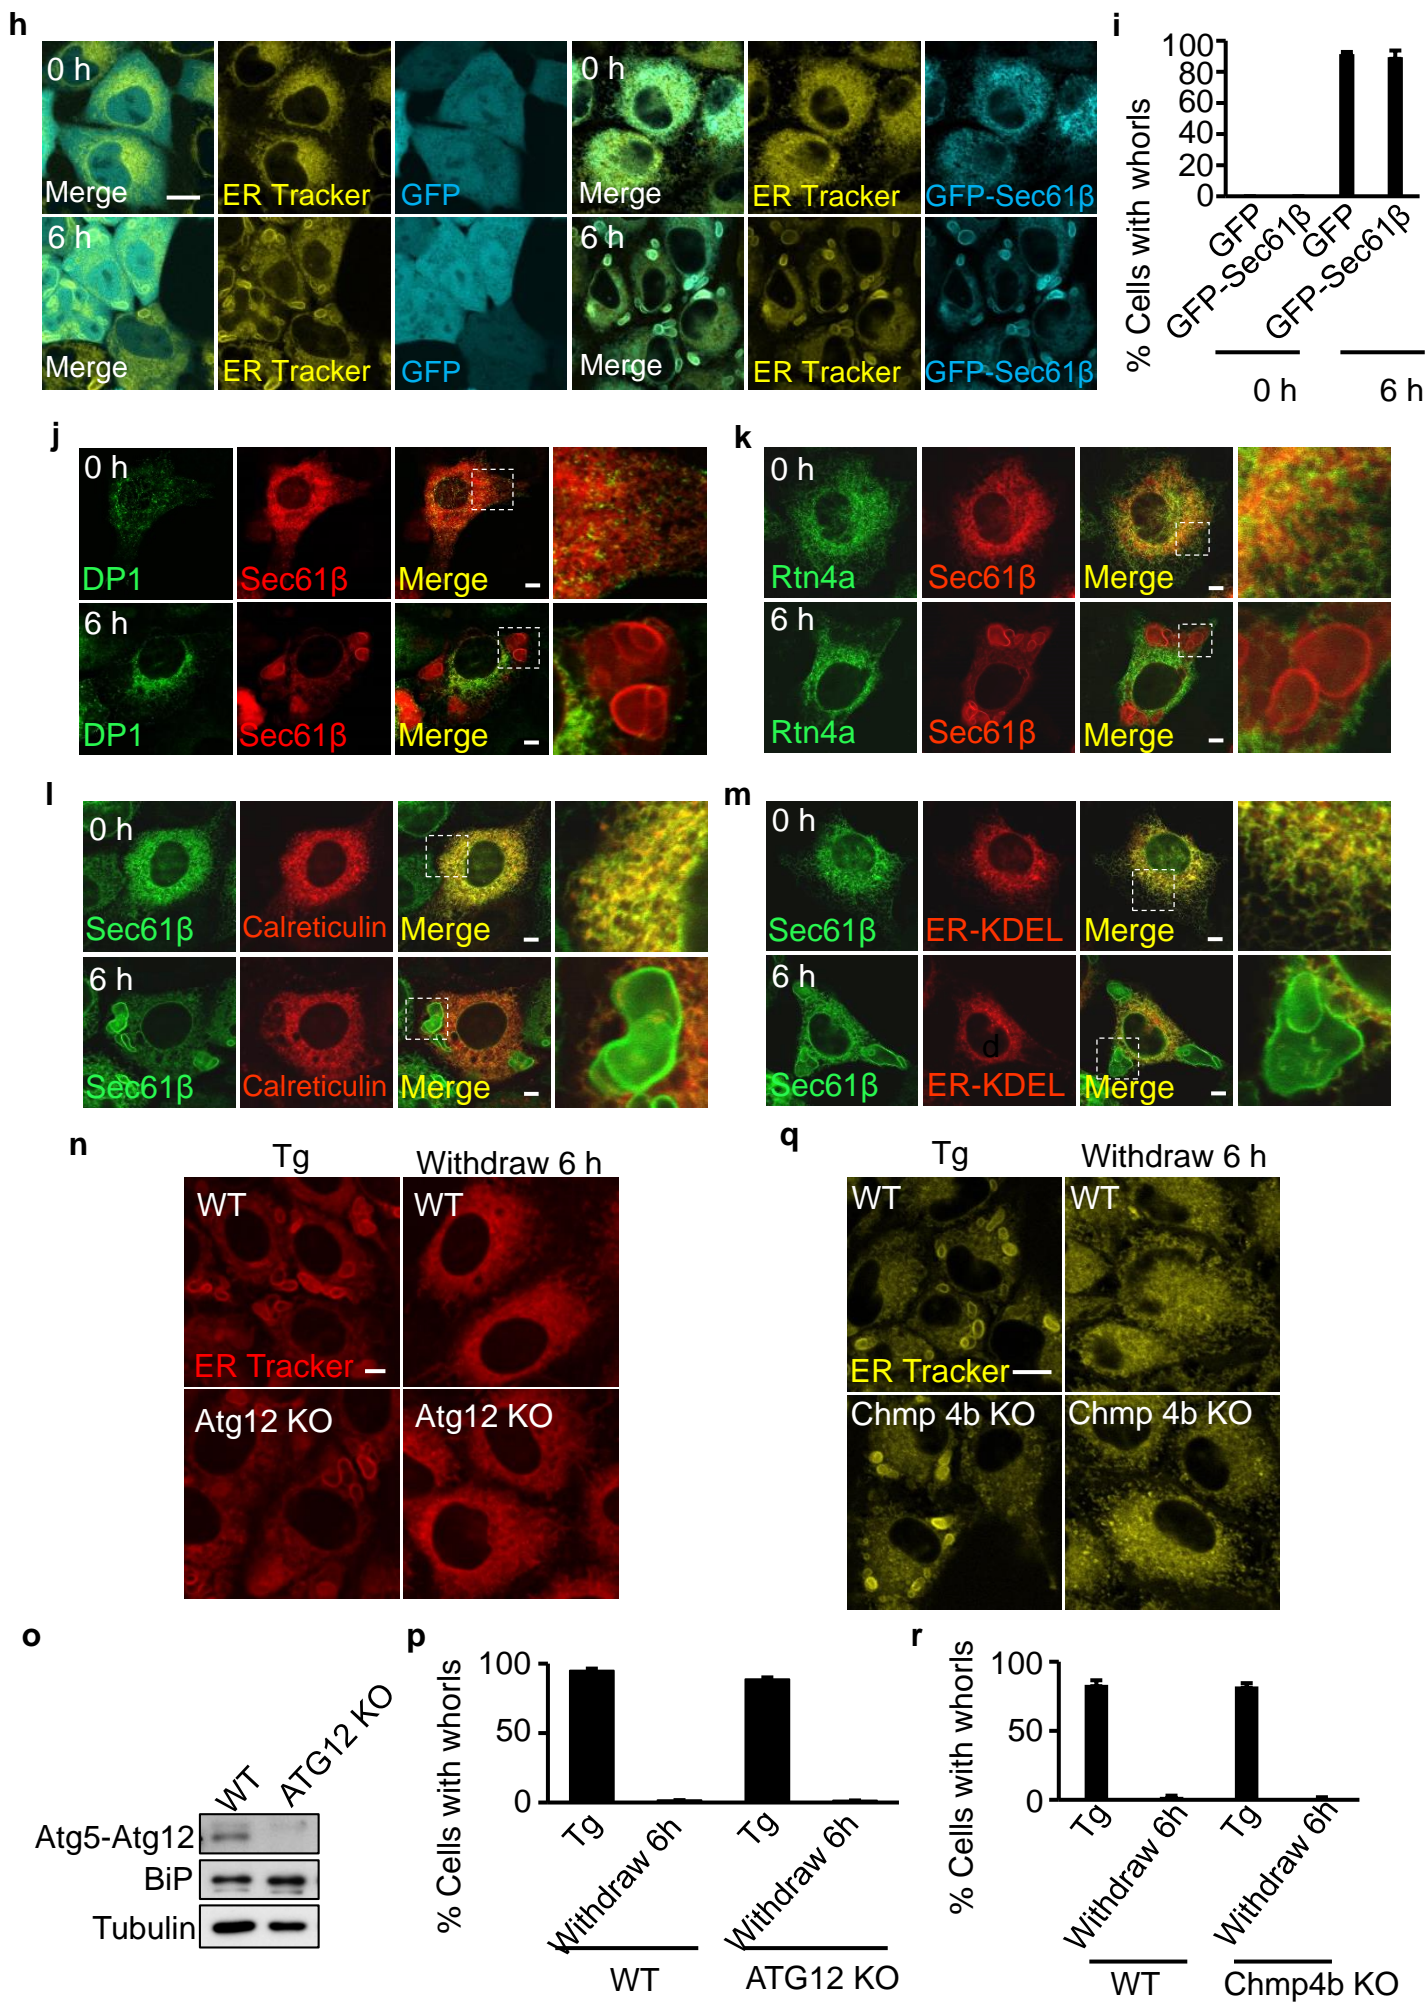

**Supplementary information, Fig. S1 a** A549 (human lung carcinoma), SW480 (human adenocarcinoma), HepG2 (human hepatocellular carcinoma), T47D (human breast cancer), Huh7 (human well differentiated hepatocellular carcinoma cells), and MDA-MB-231 (human breast cancer) cells were transfected with RFP-Sec61 $\beta$ , treated with Tg or not for 12 h, and then observed by confocal microscopy. Scale bar, 5  $\mu$ m. **b** NRK cells were treated with cyclopiazonic acid (CPA) at the indicated concentrations for 6 h, stained with ER-Tracker Red, and then visualized by confocal microscopy. Scale bar, 10  $\mu$ m. **c** Cells from **b** were quantified for ER whorls ( $n = 3$  independent experiments; more than 100 cells were assessed per independent experiment). Data represent means  $\pm$  SE. **d** GFP-Sec61 $\beta$ -expressing NRK cells were treated with dithiothreitol (DTT) or tunicamycin (Tm) at the indicated concentrations and times, and then observed by confocal microscopy. Scale bar, 10  $\mu$ m. **e** Cells from **d** were quantified for ER whorls ( $n = 3$  independent experiments; more than 100 cells were assessed per independent experiment). Data represent mean  $\pm$  SE. **f** GFP-Sec61 $\beta$ -expressing NRK cells were treated with tunicamycin (Tm) for 6 h at the indicated concentrations, and then observed by confocal microscopy. Scale bar, 10  $\mu$ m. **g** Cells from **f** were quantified for ER whorls ( $n = 3$  independent experiments; more than 50 cells were assessed per independent experiment). Data represent means  $\pm$  SE. **h** NRK cells transfected with GFP or GFP-Sec61 $\beta$  were treated with Tg for 0 or 6 h, stained with ER-Tracker Red, and then visualized by confocal microscopy. Scale bar, 10  $\mu$ m. **i** Cells from **h** were quantified for ER whorls ( $n = 3$  independent experiments; more than 100 cells were assessed per independent experiment). Data represent means  $\pm$  SE. **j, k** RFP-Sec61 $\beta$ -

expressing NRK cells transfected with the tubular ER marker GFP-DP1 or Rtn4a-GFP were treated with Tg for 0 or 6 h and then observed by confocal microscopy. Regions of interest are outlined with white dashed lines and magnified to the right. Scale bar, 5  $\mu$ m. **l, m** GFP-Sec61 $\beta$ -expressing NRK cells transfected with the luminal ER marker RFP-Calreticulin or ER-DsRed were treated with Tg for 0 or 6 h and then observed by confocal microscopy. Regions of interest are outlined with white dashed lines and magnified to the right. Scale bar, 5  $\mu$ m. **n** NRK wild-type (WT) cells and Atg12-knockout (Atg12 KO) cells were treated with Tg for 6 h, and then Tg was withdrawn. Representative confocal images of the cells stained with the dye ER-Tracker Red are shown after Tg treatment and 6 h after Tg withdrawal (withdraw 6 h). Scale bar, 10  $\mu$ m. **o** Knockout efficiency of cells from **n** was determined by western blot. **p** Cells from **n** were quantified for ER whorls ( $n = 3$  independent experiments; more than 100 cells were assessed per independent experiment). Data represent means  $\pm$  SE. **q** NRK WT cells and Chmp4b-knockout (Chmp4b KO) cells were treated with Tg for 6 h, and then Tg was withdrawn. Representative confocal images of the cells stained with the dye ER-Tracker Red are shown after Tg treatment and 6 h after Tg withdrawal (withdraw 6 h). Scale bar, 10  $\mu$ m. **r** Cells from **q** were quantified for ER whorls ( $n = 3$  independent experiments; more than 100 cells were assessed per independent experiment). Data represent means  $\pm$  SE.
