# Supplementary material for: COPII mitigates ER stress by promoting formation of ER whorls
Source: PubMed Central journal article supplement (PMC8026990; doi:10.1038/s41422-020-00416-2), 2020-09-28
Supplement: 41422_2020_416_MOESM5_ESM.pdf [file 41422_2020_416_MOESM5_ESM.pdf]

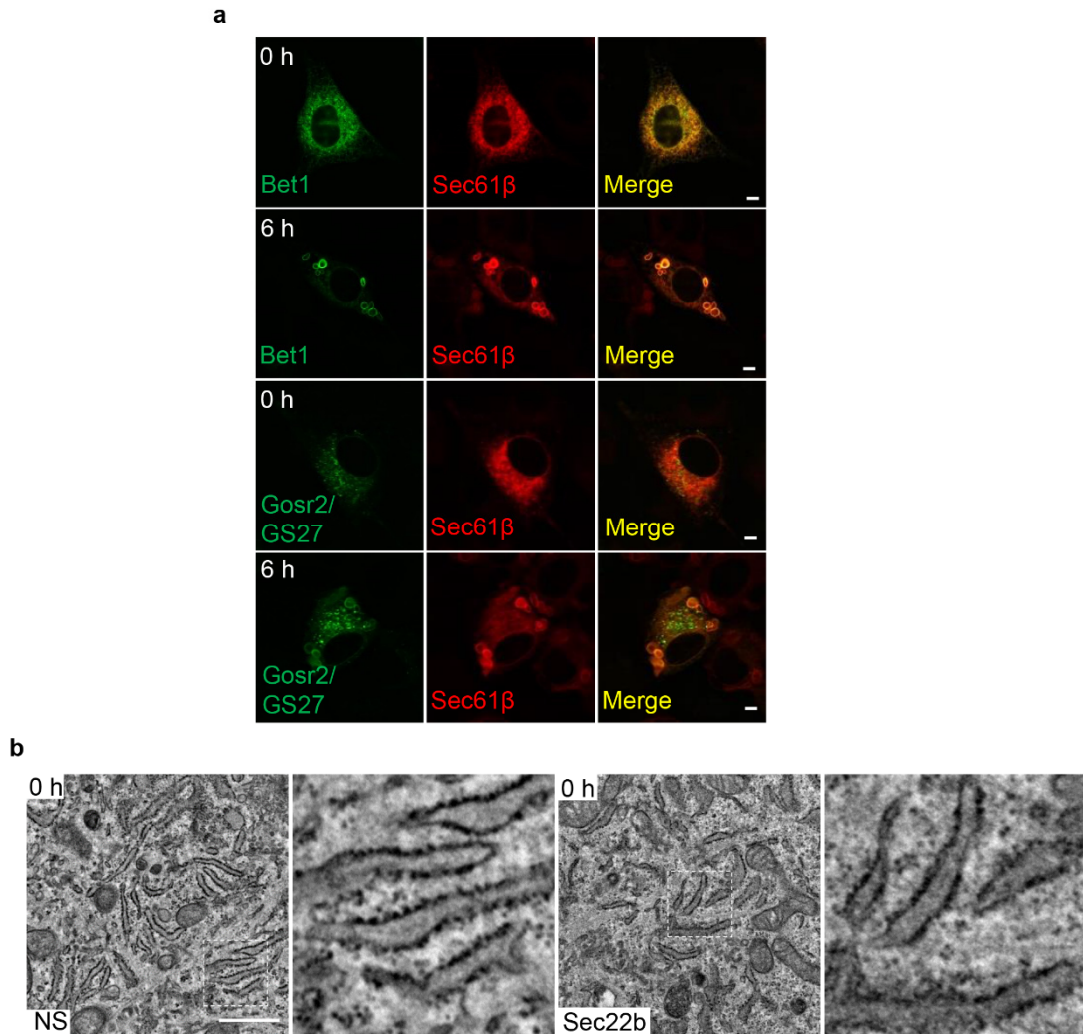

**Supplementary information, Fig. S5 a** RFP-Sec61 $\beta$ -expressing NRK cells transfected with GFP-Bet1 or GFP-Gosr2/GS27 were treated with Tg for 0 or 6 h and then observed by confocal microscopy. Scale bar, 5  $\mu$ m. **b** RFP-Sec61 $\beta$ -expressing NRK cells were transfected with nonspecific (NS) or Sec22b RNAi, treated with Tg for 0 h, and then visualized by TEM. Scale bar, 1  $\mu$ m.
